# Supplementary material for: Methylated (−)-epigallocatechin 3-O-gallate potentiates the effect of split vaccine accompanied with upregulation of Toll-like receptor 5
Source: PubMed Central journal article supplement (PMC8630126; doi:10.1038/s41598-021-02346-4), 2021-11-29
Supplement: 41598_2021_2346_MOESM1_ESM.pdf [file 41598_2021_2346_MOESM1_ESM.pdf]

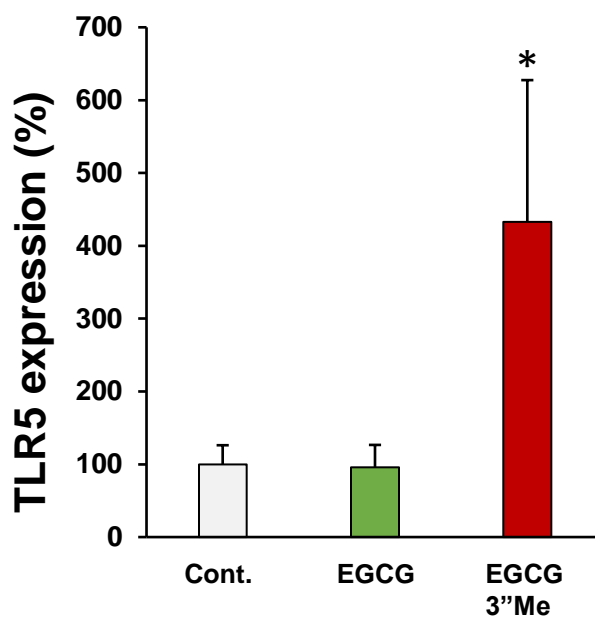

### Supplementary Figure 1

Female balb/c mice (11 wk) were randomly divided into 3 group (I, Control group, II, EGCG group (10 mg/kg p.o.) and, III, EGCG3''Me group (10 mg/kg p.o.), each 6 mice) and treated with each compound for 1 week. Mice were sacrificed under isoflurane vapor. Data are presented as means  $\pm$  SEM. \* $P < 0.05$ . Mann–Whitney U test, one tail.
